# Supplementary material for: Exercise Ventilatory Inefficiency in Post-COVID-19 Syndrome: Insights from a Prospective Evaluation
Source: MDPI journal article supplement (doi:10.3390/jcm10122591), 2021-06-11
Supplement: s1 [file s1]

## Supplementary Materials

**Suppl. Table 1.** Baseline characteristics and main features during mid-term follow-up in recovered COVID-19 patients according to the presence of persistent dyspnea in outpatients.

**Suppl. Table 2.** Baseline characteristics and main features during mid-term follow-up in recovered COVID-19 patients according to the presence of persistent dyspnea among hospitalized patients.

**Suppl. Figure 1.** Schematic flowchart of the recovered COVID-19 patients included in the study, showing main findings.

**Suppl. Table S1.** Baseline characteristics and main features during mid-term Figure 19. patients according to the presence of persistent dyspnea in outpatients.

|                                                  | Persistent Dyspnea*<br>n = 10 (59) | No residual dyspnea<br>n= 7 (40) | p-value          |
|--------------------------------------------------|------------------------------------|----------------------------------|------------------|
| <b>Demographics, comorbidities, and symptoms</b> |                                    |                                  |                  |
| Female sex (%)                                   | 6 (85)                             | 8 (80)                           | 0.999            |
| Age (years)                                      | 47.5 (38–57)                       | 46 (36–51)                       | 0.406            |
| BSA (m <sup>2</sup> )                            | 1.86 (1.69–1.94)                   | 1.69 (1.67–1.74)                 | 0.187            |
| Dyslipidemia (%)                                 | 1 (10)                             | 1 (14)                           | 0.999            |
| Hypertension (%)                                 | 1 (10)                             | 0                                | 0.999            |
| KCCQ summary score                               | 48.8±7.1                           | 89.4±6.5                         | <b>&lt;0.001</b> |
| Fatigue (%)                                      | 5 (50)                             | 0                                | <b>0.044</b>     |
| Myalgia (%)                                      | 3 (30)                             | 0                                | 0.228            |
| Neurological symptoms (%)                        | 2 (28.6)                           | 3 (30)                           | 0.999            |
| <b>Resting echocardiographic findings</b>        |                                    |                                  |                  |
| LAVI (mL/m <sup>2</sup> )                        | 21.2 (20.5–26)                     | 21.3 (17.7–23)                   | 0.848            |
| LVEF (%)                                         | 59 (58–70)                         | 64 (62–68.5)                     | 0.630            |
| Mitral E/A ratio                                 | 1.2 (0.89–1.8)                     | 1.4 (1.23–1.71)                  | 0.368            |
| Average E/e' ratio                               | 6.2 (4.64–6.6)                     | 6 (5.6–7.2)                      | 0.832            |
| TAPSE (mm)                                       | 20.5 (20–26)                       | 22 (21–27)                       | 0.237            |
| Global longitudinal strain (%)                   | 22 (22.5–21)                       | 22.5 (23–21)                     | 0.471            |
| <b>Cardiopulmonary exercise test</b>             |                                    |                                  |                  |
| Peak Vo <sub>2</sub> (ml/min/kg)                 | 20.3 (17.2–23.2)                   | 29.5 (24.5–33.2)                 | <b>0.023</b>     |
| % of predicted pVo <sub>2</sub>                  | 82 (76–94)                         | 103 (101–108)                    | <b>0.011</b>     |
| Vo <sub>2</sub> at AT <sub>1</sub> (ml/min/kg)   | 15.8 (15.2–19.8)                   | 22.2 (18.7–25.3)                 | 0.142            |
| Vo <sub>2</sub> /HR                              | 10 (8.4–9.2)                       | 10.2 (9.8–11.8)                  | 0.427            |
| VE/Vco <sub>2</sub> slope                        | 27.6 (23.6–29.8)                   | 29.7 (27.1–30.7)                 | 0.672            |
| PETCO <sub>2</sub> at AT <sub>1</sub> (mmHg)     | 40 (35–43)                         | 38 (38–41)                       | 0.948            |
| % of predicted HR                                | 85.6 (80.8–88.8)                   | 95 (92.6–96)                     | <b>0.017</b>     |
| Resting O <sub>2</sub> saturation (%)            | 97 (98–99)                         | 97 (97–98.5)                     | 0.324            |
| Peak O <sub>2</sub> saturation (%)               | 98 (96–99)                         | 97 (97–98)                       | 0.387            |
| <b>Pulmonary lung function</b>                   |                                    |                                  |                  |
| DLCO % of predicted                              | 95 (87–99)                         | 87.3 (81–91)                     | 0.278            |
| KCO % of predicted                               | 104 (94–115)                       | 89 (87–92)                       | 0.06             |
| FEV1 % of predicted                              | 106 (103–117)                      | 1109.8 (109–114)                 | 0.514            |
| FVC % of predicted                               | 112.5 (106–118)                    | 113.8 (111–118)                  | 0.664            |
| FEV1/FVC (%)                                     | 94 (86–105)                        | 101.5 (90–106)                   | 0.55             |
| 6-MWT distance (meters)                          | 511 (470–542)                      | 633.5 (615–655)                  | <b>0.009</b>     |

Values are median (IQR), mean ± SD, or n (%). **Bold** indicates significant differences (p<0.05). \* Persistent dyspnea was defined as NYHA ≥ II.

**Suppl. Table S2.** Baseline characteristics and main features during mid-term Figure 19. patients according to the presence of dyspnea in hospitalized patients.

|                                                  | Persistent<br>Dyspnea*<br>n = 31 (60) | No residual Dyspnea<br>n= 22 (40) | p-value      |
|--------------------------------------------------|---------------------------------------|-----------------------------------|--------------|
| <b>Demographics, comorbidities, and symptoms</b> |                                       |                                   |              |
| Female sex (%)                                   | 22 (71)                               | 9 (29)                            | <b>0.029</b> |
| Age (years)                                      | 59 (54–65)                            | 61 (47–69)                        | 0.342        |
| BSA (m <sup>2</sup> )                            | 1.77 (1.68–1.94)                      | 1.93 (1.77–2.03)                  | 0.095        |
| Dyslipidemia (%)                                 | 6 (19.4)                              | 5 (22.7)                          | 0.999        |
| Hypertension (%)                                 | 11 (35.5)                             | 6 (27.3)                          | 0.528        |
| KCCQ summary score                               | 63.4±19.7                             | 80.6±11.9                         | <b>0.001</b> |
| Fatigue (%)                                      | 12 (38.7)                             | 3 (13.6)                          | <b>0.046</b> |
| Myalgia (%)                                      | 1 (3.2)                               | 2 (9.1)                           | 0.563        |
| Neurological symptoms (%)                        | 2 (6.5)                               | 7 (31.8)                          | <b>0.025</b> |
| <b>Resting echocardiographic findings</b>        |                                       |                                   |              |
| LAVI (mL/m <sup>2</sup> )                        | 22.1 (17.2–31.3)                      | 23.7 (19.4–26.1)                  | 0.748        |
| LVEF (%)                                         | 65 (60.5–67.5)                        | 61.5 (59–71)                      | 0.745        |
| Mitral E/A ratio                                 | 0.85 (0.76–1.08)                      | 0.83 (0.67–1.06)                  | 0.843        |
| Average E/e' ratio                               | 7 (5.4–8.9)                           | 6.2 (4.9–7.3)                     | 0.195        |
| TAPSE (mm)                                       | 23 (20–27)                            | 23 (22–25)                        | 0.813        |
| Global longitudinal strain (%)                   | 19.5 (21.7–18)                        | 19.6 (21.6–19)                    | 0.992        |
| <b>Cardiopulmonary exercise test</b>             |                                       |                                   |              |
| Peak Vo <sub>2</sub> (ml/min/kg)                 | 17.5 (14–19.7)                        | 21.6 (18.4–25)                    | <b>0.001</b> |
| % of predicted pVo <sub>2</sub>                  | 77 (61–89.5)                          | 95 (85–100)                       | <b>0.002</b> |
| Vo <sub>2</sub> at AT <sub>1</sub> (ml/min/kg)   | 12.8 (8.7–15.4)                       | 17 (14.5–19.1)                    | <b>0.004</b> |
| Vo <sub>2</sub> /HR                              | 6.9 (8.4–11)                          | 11.2 (8.4–13.4)                   | <b>0.015</b> |
| VE/Vco <sub>2</sub> slope                        | 33.1 (30.9–38.3)                      | 28.8 (26.9–31.6)                  | <b>0.004</b> |
| PETCO <sub>2</sub> at AT <sub>1</sub> (mmHg)     | 34 (32–38)                            | 38 (35–40)                        | <b>0.010</b> |
| % of predicted HR                                | 87 (77.8–96.1)                        | 95 (87–103)                       | <b>0.02</b>  |
| Resting O <sub>2</sub> saturation (%)            | 97 (95–97)                            | 97 (96–98)                        | 0.216        |
| Peak O <sub>2</sub> saturation (%)               | 97 (96–97)                            | 97 (95–98)                        | 0.870        |
| <b>Pulmonary lung function</b>                   |                                       |                                   |              |
| DLco % of predicted                              | 84 (70–92.1)                          | 91 (85–102)                       | <b>0.018</b> |
| Kco % of predicted                               | 93 (83–104.3)                         | 104.3 (91–112)                    | 0.052        |
| FEV1 % of predicted                              | 113 (102–122)                         | 115 (105–124)                     | 0.690        |
| FVC % of predicted                               | 119 (102–134)                         | 118 (104–121)                     | 0.816        |
| FEV1/FVC (%)                                     | 99 (87–107)                           | 102 (98–104)                      | 0.657        |
| 6-MWT distance (meters)                          | 550 (465–600)                         | 582.5 (537.5–640)                 | <b>0.039</b> |

Values are median (IQR), mean ± SD, or n (%). **Bold** indicates significative differences (p<0.05). \* Persistent dyspnea was defined as NYHA ≥ II.

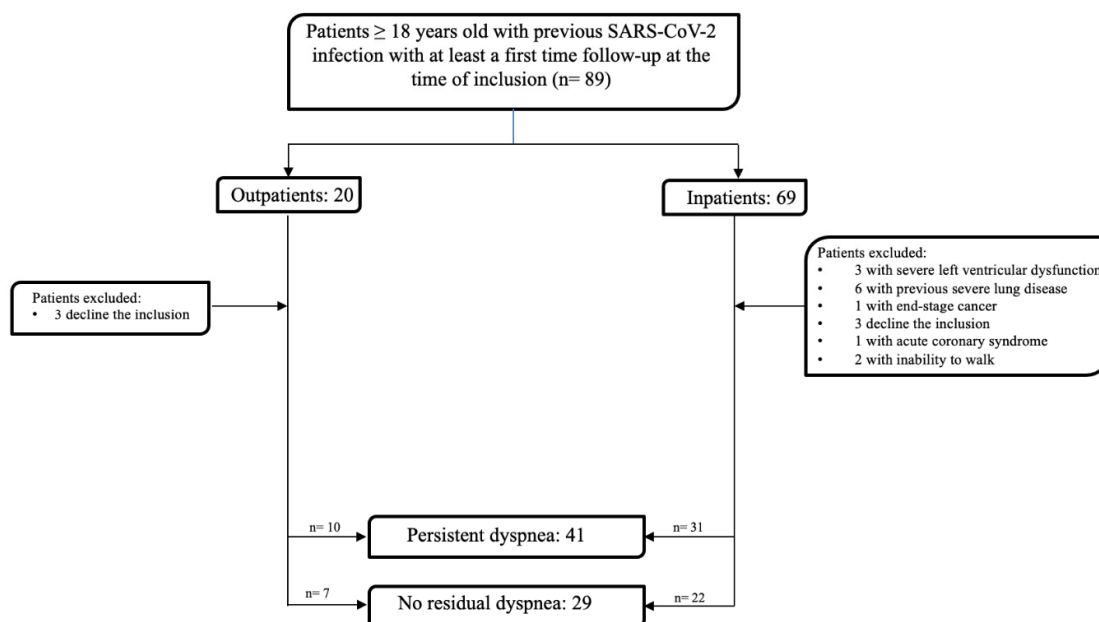

**Suppl. Figure S1.** Schematic flowchart of the recovered COVID-19 patients included in the study, showing main findings.
